# Supplementary material for: High efficiency organic/a-Si hybrid tandem solar cells with complementary light absorption
Source: Royal Society of Chemistry journal article supplement (doi:10.1039/c4ta02690j), 2014-07-29
Supplement: c4ta02690j1.pdf [file c4ta02690j1.pdf]

## Supporting information

### Organic/a-Si hybrid solar cells with complementary light absorption

Wei Qin,<sup>ae, ‡</sup> Wei Yu,<sup>ae, ‡</sup> Wei Zi,<sup>b</sup> Xiang Liu,<sup>c</sup> Tao Yuan,<sup>d</sup> Dong Yang,<sup>ae</sup> Shubo Wang,<sup>a</sup>

Guoli Tu,<sup>d</sup> Jian Zhang,<sup>a,\*</sup> Frank Shengzhong Liu,<sup>ab,\*</sup> Can Li<sup>a,\*</sup>

[\*]These authors equally contribute to this work

<sup>a</sup> State Key Laboratory of Catalysis, Dalian Institute of Chemical Physics, Chinese Academy of Sciences; Dalian National Laboratory for Clean Energy, Dalian 116023, China

<sup>b</sup> Key Laboratory of Applied Surface and Colloid Chemistry, National Ministry of Education, China, School of Materials Science and Engineering, Shaanxi Normal University, Xi'an 710062, China

<sup>c</sup> School of material science and engineering, Dalian Jiaotong University, Dalian 116023, China

<sup>d</sup> Wuhan National Laboratory for Optoelectronics, Huazhong University of Science and Technology, Wuhan, 430074, China

<sup>e</sup> Graduate University of Chinese Academy of Sciences, Beijing 100049, China.

E-mail:

[canli@dicp.ac.cn](mailto:canli@dicp.ac.cn)

[jianzhang@dicp.ac.cn](mailto:jianzhang@dicp.ac.cn)

[szliu@dicp.ac.cn](mailto:szliu@dicp.ac.cn)

## **Experimental Section**

### **a-Si solar cell fabrication**

The a-Si (p-type/intrinsic/n-type stack) thin film was deposited on FTO glass (NSG Inc., Model name TEC-7, sheet resistance is lower than  $10 \Omega \text{ sq.}^{-1}$ ) using radio-frequency plasma enhanced chemical vapor deposition. The a-Si multilayers were deposited in separated chambers to prevent from inter-contamination. To obtain properties suitable for better performance of solar cells, each single layer of a-Si stack was optimized individually by tuning the deposition parameters. This inorganic solar cell was demonstrated as the top-cell.

### **Organic solar cell fabrication**

The ITO layer was deposited on the a-Si top-cell using magnetron sputtering, afterward a  $\sim 40$  nm thick PEDOT: PSS (Clevios 4083, purchased from H. C. Starck) layer was spin coated onto the ITO layer. The samples were then annealed on a hot plate at  $150 \text{ }^\circ\text{C}$  for 15 minutes in air. Poly (diketopyrrolopyrrole-terthiophene) (PDPP3T) and [6,6]-phenyl- $\text{C}_{61}$ -butyric acid methyl ester ( $\text{PC}_{61}\text{BM}$ ), and [6,6]-phenyl- $\text{C}_{71}$ -butyric acid methyl ester ( $\text{PC}_{71}\text{BM}$ ) were bought from Solarmer and used as received. The PDPP3T: $\text{PC}_{71}\text{BM}$  (1:2, weight ratio) and PDPP3T: $\text{PC}_{61}\text{BM}$  (1:2, weight ratio) was dissolved in dichlorobenzene-chloroform-1,8-diiodooctane (ODCB-CF-DIO, purchased from Sigma-Aldrich Co. Ltd) ternary solvent with a total concentration of  $15.0 \text{ mg ml}^{-1}$ , respectively. The photoactive layers were spin-coated onto the PEDOT:PSS layer. The thickness of the PDPP3T: PCBM active layer was characterized by a Bruker Dektak-150 stylus profilometry.

## **Multi-junction device fabrication**

The structure of organic/a-Si hybrid multi-junction solar cells was as follows: glass/ FTO/ a-Si/ ITO/ PEDOT: PSS/ PDPP3T: PC<sub>61</sub>BM/ cathode interface layer/ Al (Figure 1a). ITO and PEDOT: PSS double layers were applied as intermediate layer. After spin-coating of PEDOT:PSS and PDPP3T:PCBM layers, devices with Ca/Al as the back-contact were then transferred to the vacuum chamber for metal contact evaporation. 10 nm Ca and 150 nm Al were successively deposited by thermal evaporation. For devices with PF<sub>EO</sub>SO<sub>3</sub>Na CIL, PF<sub>EO</sub>SO<sub>3</sub>Na solution of 0.25 mg ml<sup>-1</sup> in CH<sub>3</sub>OH was spin-coated on top of the active layer. Then the devices were transferred to vacuum chamber for evaporation of Al electrode.

## **Characterization**

A computer-controlled Keithley 2400 source measure unit was used to characterize the J-V performance of solar cells along with an AM 1.5G oriel solar simulator at illumination intensity of 100 mW cm<sup>-2</sup>. The corresponding external quantum efficiency was characterized on the Enli technology QE-R system. In order to test the EQE of the top and bottom component cells, bias-light with wavelength at 780 nm and 400 nm was applied, respectively. The ultraviolet-visible absorption spectra (UV-Vis) were measured on a Varian Cary 5000 spectrometer. SKPM test was carried out on Bruker Metrology Nanoscope III-D atomic force microscopy at ambient atmosphere. Conducting AFM tips used for this study had a typical spring constant of 2.8 N m<sup>-1</sup> and a resonant frequency of 75 kHz.

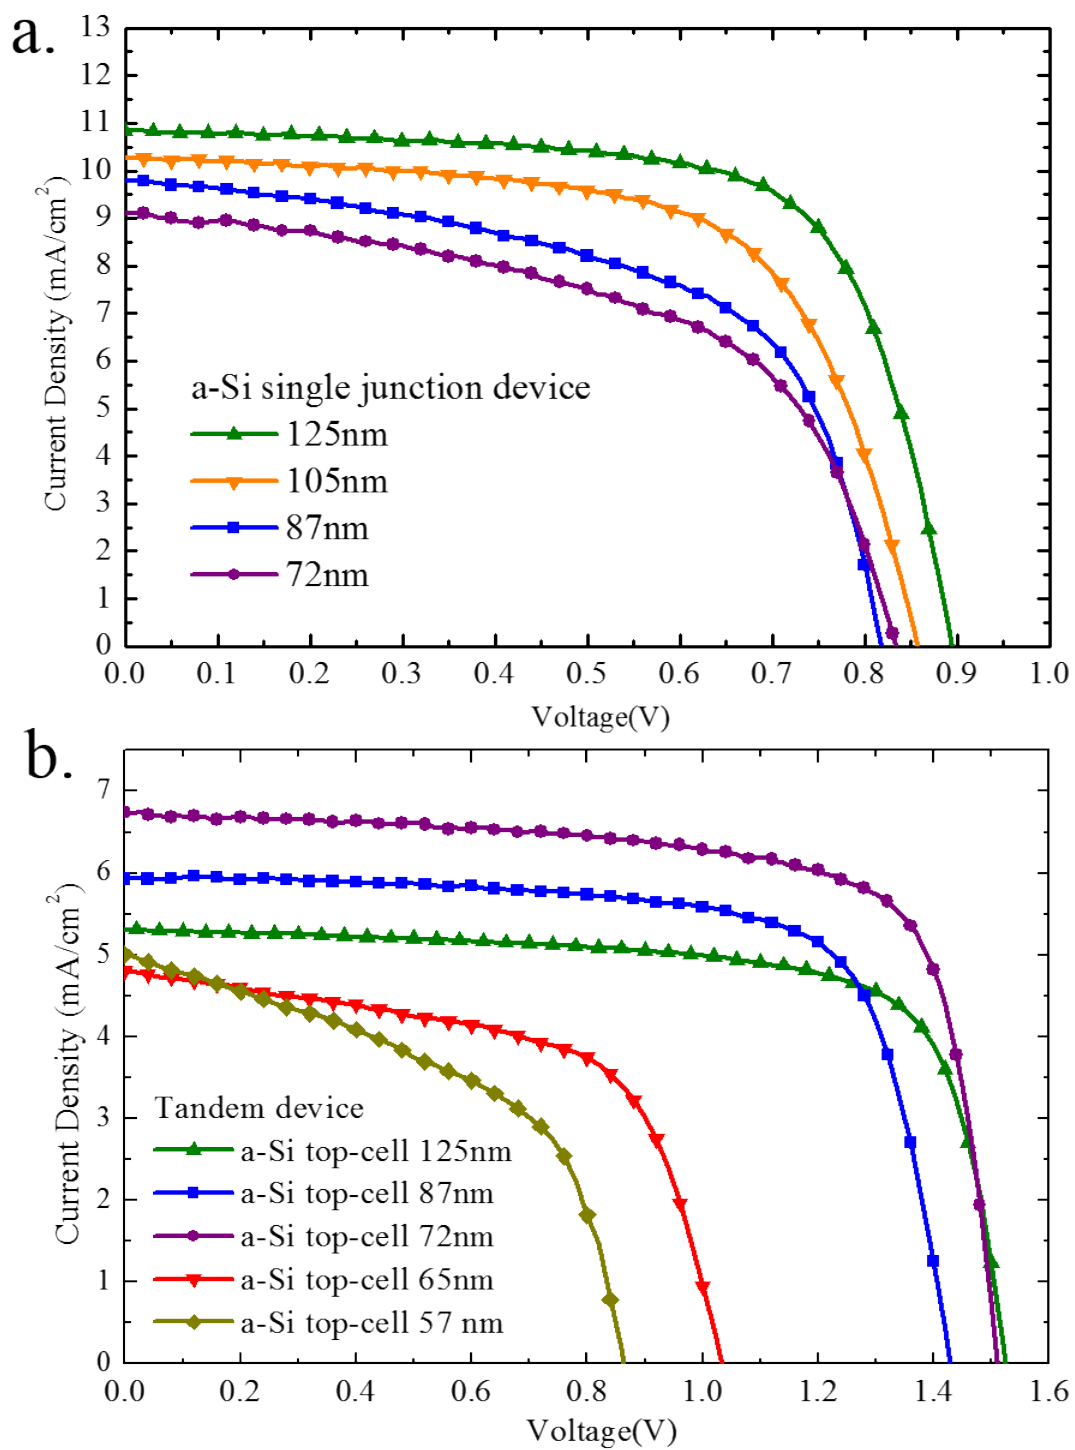

**Figure S1** J-V characteristics of (a) single junction a-Si devices with various thickness, and (b) hybrid multi-junction solar cells with different thickness of a-Si top cell.

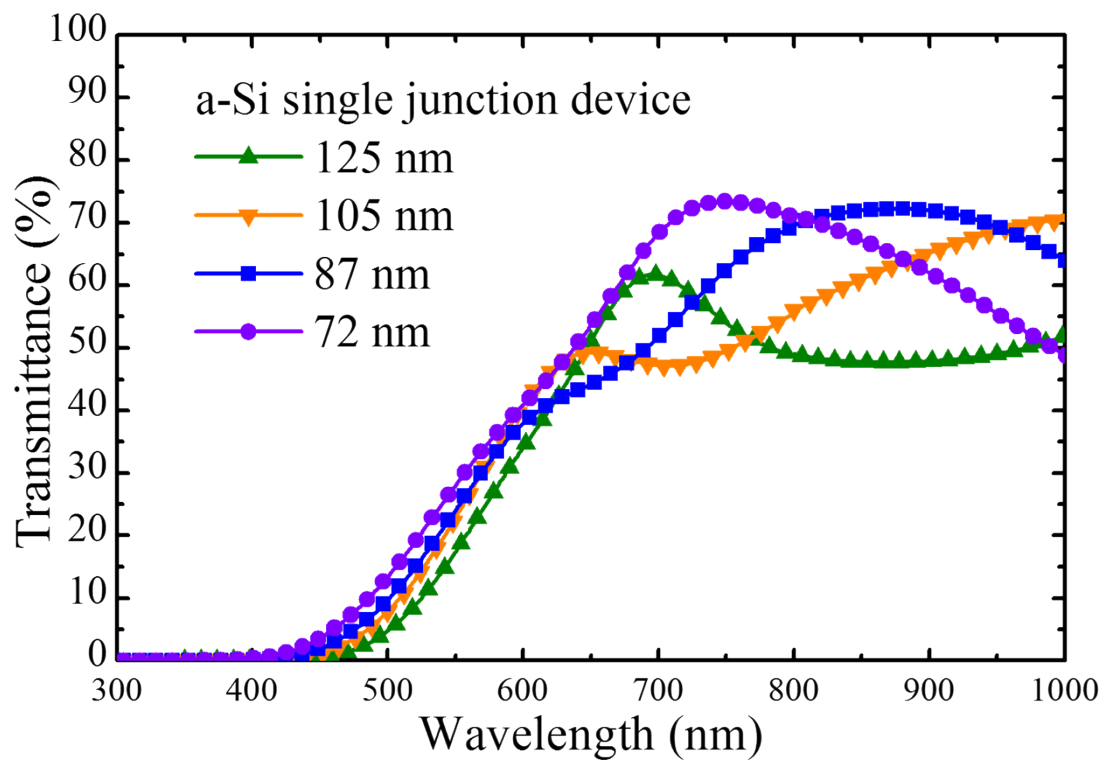

**Figure S2** UV-Vis transmittance spectrum of single junction a-Si devices with various thickness.
